# Supplementary material for: Colorimetric assay of Hg2+ based on the inhibition of peroxidase mimetic activity of gold nanoclusters induced by Hg2+
Source: Royal Society of Chemistry journal article supplement (doi:10.1039/c9ay00109c), 2019-01-01
Supplement: c9ay00109c1.pdf [file c9ay00109c1.pdf]

## **Supporting Information**

### **Colorimetric assay of Hg<sup>2+</sup> based on the inhibition of peroxidase mimetic activity of gold nanoclusters induced by Hg<sup>2+</sup>**

**Xueding Jiang,<sup>1\*</sup> Weicheng Xu,<sup>1</sup> Xin Chen,<sup>1</sup> and Yong Liang<sup>2\*</sup>**

<sup>1</sup> School of Environment and Chemical Engineering, Foshan University, Foshan,  
528000, China

<sup>2</sup> School of Chemistry and Environment, South China Normal University, Guangzhou,  
510631, China

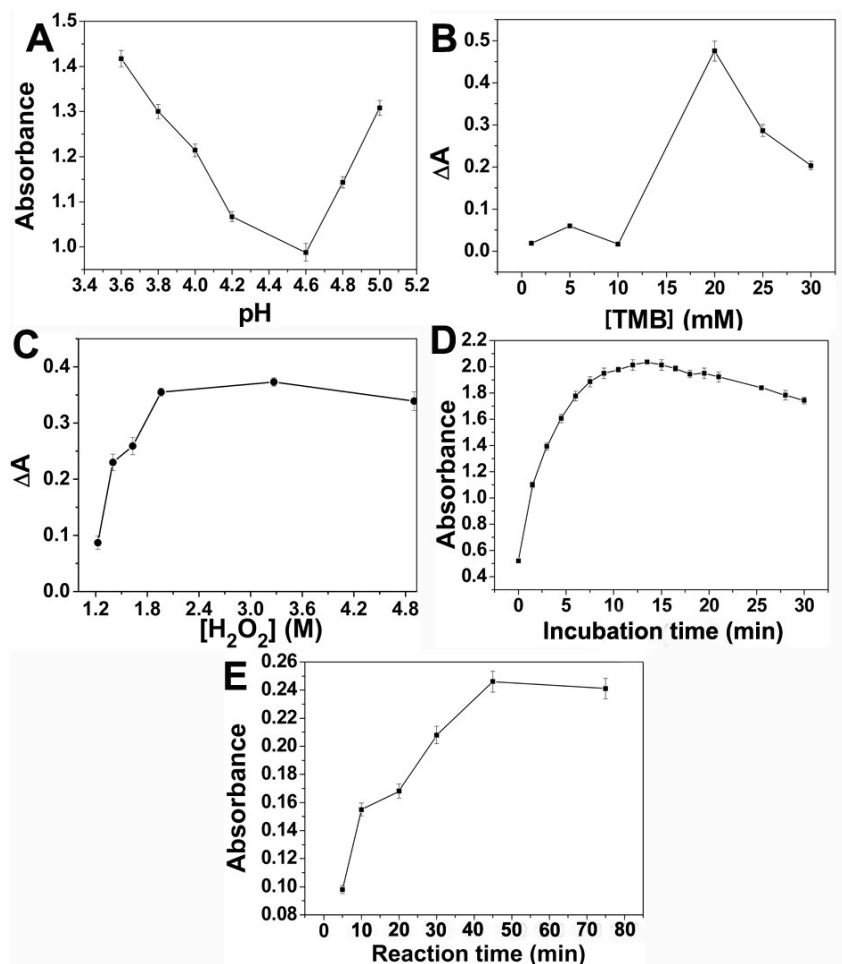

**Fig. S1** Effects of (A) pH, (B) TMB concentration, (C)  $H_2O_2$  concentration, (D) reaction time between TMB and  $H_2O_2$ , and (E) incubation time of  $Hg^{2+}$  on the peroxidase-like activity of AuNCs. Error bar represents the standard deviation ( $n=3$ ). Experimental conditions: TMB concentration: 20 mM,  $H_2O_2$  concentration: 1.96 M,  $Hg^{2+}$  concentration: 1  $\mu M$ , pH=4.6.
